# Supplementary material for: Evaluation of Kidney Histological Images Using Unsupervised Deep Learning
Source: PubMed Central journal article supplement — Kidney Int Rep. 2021 Jun 24;6(9):2445–54. doi: 10.1016/j.ekir.2021.06.008 (PMC8418980; doi:10.1016/j.ekir.2021.06.008), 2021-06-24
Supplement: mmc1.pdf [file mmc1.pdf]

**Supplementary Text S1. The complete listing of the steps of the proposed workflow**

**Supplementary Table S1. The proportion of images of each patient in the train, test, and validation dataset**

**Supplementary Table S2. The statistical summary of the linear models testing the relationship between the scores and the clinical variables**

**Supplementary Table S3. The R squared values for the linear models investigating the relationship between the scores and clinical variables**

**Supplementary Table S4. The statistical summary of the linear models testing the relationship between the patch-based scores and the clinical variables**

**Supplementary Table S5. The R squared values for the linear models investigating the relationship between the patch-based scores and clinical variables**

**Supplementary Table S6. The clinical and pathological findings of the second and third biopsy of the patient with multiple biopsies**

**Supplementary Figure S1. The visualization of the UMAP Results**

**Supplementary Figure S2. The representative glomeruli for each cluster**

**Supplementary Figure S3. The changes in the patch-based scores for the patient with multiple biopsies**

## Supplementary Text S1. The complete listing of the steps of the proposed workflow

### Input: A set of cropped glomerulus images

#### - Workflow 1: whole glomerulus images

1. Normalize the staining by the method proposed by Macenko *et al.*
2. Remove the images with a higher proportion of white pixels
3. Resize to 331 x 331
4. Extract features using the global averaging the final layer of Neural Architecture Search Network (NASNet)
5. Perform Uniform Manifold Approximation and Projection on the obtained vectors
6. Clustering using Gaussian Mixture Models and the criteria of Bayesian information criterion
7. Augmentation of the images
8. Fine-tune the NASNet by the obtained cluster as the label
9. Make predictions on the trained model with all the normalized images as the input
10. Average the glomerulus score for each patient
11. Test the relationship between clinical variables using the linear models
12. Obtain the class activation mapping

#### - Workflow 2: patched images

1. Normalize the staining by the method proposed by Macenko *et al.*
2. Split the images into equally divided 16 patches
3. Remove the images with a higher proportion of white pixels
4. Resize all the patches to 96 x 96
5. Extract features using convolutional autoencoder
6. Clustering using Gaussian Mixture Models and the criteria of Bayesian information criterion
7. Fine-tuning the encoders by the obtained cluster as the label
8. Make predictions on the trained model with all the normalized patched images as the input
9. Calculate the glomerulus score by summing the patch-based score
10. Average the glomerulus score for each patient
11. Test the relationship between clinical variables using the linear models
12. Obtain the class activation mapping

**Supplementary Table S1. The proportion of the glomerulus images of the patients included in train, test, and validation dataset**

| <b>train_prop</b> | <b>test_prop</b> | <b>val_prop</b> | <b>patient_num</b> |
|-------------------|------------------|-----------------|--------------------|
| 0.027             | 0.015            | 0.038           | 1                  |
| 0.001             | 0.0              | 0.0             | 2                  |
| 0.012             | 0.015            | 0.014           | 3                  |
| 0.006             | 0.004            | 0.009           | 4                  |
| 0.02              | 0.011            | 0.014           | 5                  |
| 0.006             | 0.0              | 0.0             | 6                  |
| 0.008             | 0.004            | 0.014           | 7                  |
| 0.009             | 0.008            | 0.0             | 8                  |
| 0.004             | 0.0              | 0.0             | 9                  |
| 0.005             | 0.004            | 0.0             | 10                 |
| 0.015             | 0.019            | 0.009           | 11                 |
| 0.002             | 0.015            | 0.0             | 12                 |
| 0.002             | 0.004            | 0.005           | 13                 |
| 0.004             | 0.008            | 0.005           | 14                 |
| 0.015             | 0.023            | 0.028           | 15                 |
| 0.017             | 0.015            | 0.009           | 16                 |
| 0.028             | 0.027            | 0.024           | 17                 |
| 0.005             | 0.004            | 0.0             | 18                 |
| 0.013             | 0.011            | 0.014           | 19                 |
| 0.007             | 0.011            | 0.014           | 20                 |
| 0.005             | 0.0              | 0.014           | 21                 |
| 0.019             | 0.023            | 0.033           | 22                 |
| 0.001             | 0.0              | 0.0             | 23                 |
| 0.005             | 0.008            | 0.009           | 24                 |
| 0.004             | 0.0              | 0.0             | 25                 |
| 0.007             | 0.011            | 0.019           | 26                 |
| 0.005             | 0.008            | 0.0             | 27                 |
| 0.017             | 0.008            | 0.019           | 28                 |
| 0.011             | 0.011            | 0.014           | 29                 |
| 0.005             | 0.008            | 0.009           | 30                 |
| 0.017             | 0.011            | 0.009           | 31                 |
| 0.007             | 0.011            | 0.005           | 32                 |
| 0.006             | 0.015            | 0.005           | 33                 |
| 0.008             | 0.011            | 0.005           | 34                 |
| 0.015             | 0.038            | 0.019           | 35                 |
| 0.008             | 0.004            | 0.0             | 36                 |
| 0.007             | 0.004            | 0.014           | 37                 |
| 0.009             | 0.008            | 0.019           | 38                 |
| 0.001             | 0.0              | 0.0             | 39                 |
| 0.012             | 0.015            | 0.019           | 40                 |
| 0.005             | 0.008            | 0.009           | 41                 |
| 0.023             | 0.038            | 0.019           | 42                 |
| 0.019             | 0.019            | 0.024           | 43                 |

| <b>train_prop</b> | <b>test_prop</b> | <b>val_prop</b> | <b>patient_num</b> |
|-------------------|------------------|-----------------|--------------------|
| 0.045             | 0.042            | 0.038           | 44                 |
| 0.009             | 0.008            | 0.0             | 45                 |
| 0.036             | 0.027            | 0.038           | 46                 |
| 0.038             | 0.027            | 0.038           | 47                 |
| 0.02              | 0.023            | 0.009           | 48                 |
| 0.045             | 0.023            | 0.033           | 49                 |
| 0.018             | 0.015            | 0.028           | 50                 |
| 0.013             | 0.015            | 0.005           | 51                 |
| 0.045             | 0.045            | 0.038           | 52                 |
| 0.041             | 0.049            | 0.033           | 53                 |
| 0.024             | 0.023            | 0.019           | 54                 |
| 0.026             | 0.011            | 0.014           | 55                 |
| 0.007             | 0.008            | 0.014           | 56                 |
| 0.019             | 0.042            | 0.033           | 57                 |
| 0.036             | 0.03             | 0.033           | 58                 |
| 0.019             | 0.027            | 0.019           | 59                 |
| 0.012             | 0.008            | 0.0             | 60                 |
| 0.043             | 0.049            | 0.062           | 61                 |
| 0.015             | 0.019            | 0.014           | 62                 |
| 0.015             | 0.004            | 0.014           | 63                 |
| 0.024             | 0.019            | 0.024           | 64                 |
| 0.012             | 0.015            | 0.024           | 65                 |
| 0.014             | 0.019            | 0.0             | 66                 |
| 0.002             | 0.0              | 0.005           | 67                 |

patient\_num, the deidentified patient identification number; train\_prop, the proportion of the glomeruli image of the respective patient used in the training; test\_prop, the proportion of the glomeruli image of the respective patient used in the testing; val\_prop, the proportion of the glomeruli image of the respective patient used in the validation.

**Supplementary Table S2. The statistical summary of the linear models testing the relationship between the scores and the clinical variables**

| Estimate | Std. Error | t value | p-value | Variables | Cluster     | Bonf  | Sig   |
|----------|------------|---------|---------|-----------|-------------|-------|-------|
| 45.218   | 3.653      | 12.378  | 0.0     | Age       | (Intercept) | nan   | nan   |
| -34.252  | 33.33      | -1.028  | 0.308   | Age       | Cluster1    | 1.0   | False |
| 44.421   | 5.25       | 8.461   | 0.0     | Age       | (Intercept) | nan   | nan   |
| -12.768  | 28.173     | -0.453  | 0.652   | Age       | Cluster2    | 1.0   | False |
| 31.773   | 4.024      | 7.896   | 0.0     | Age       | (Intercept) | nan   | nan   |
| 107.063  | 34.711     | 3.084   | 0.003   | Age       | Cluster3    | 0.036 | True  |
| 47.275   | 4.372      | 10.814  | 0.0     | Age       | (Intercept) | nan   | nan   |
| -56.934  | 42.641     | -1.335  | 0.186   | Age       | Cluster4    | 1.0   | False |
| 49.095   | 5.586      | 8.788   | 0.0     | Age       | (Intercept) | nan   | nan   |
| -245.419 | 183.937    | -1.334  | 0.187   | Age       | Cluster5    | 1.0   | False |
| 50.713   | 3.58       | 14.165  | 0.0     | Age       | (Intercept) | nan   | nan   |
| -81.885  | 27.767     | -2.949  | 0.004   | Age       | Cluster6    | 0.053 | False |
| 43.431   | 3.37       | 12.887  | 0.0     | Age       | (Intercept) | nan   | nan   |
| -528.05  | 1135.17    | -0.465  | 0.643   | Age       | Cluster7    | 1.0   | False |
| 65.621   | 8.925      | 7.352   | 0.0     | Age       | (Intercept) | nan   | nan   |
| -171.069 | 63.442     | -2.696  | 0.009   | Age       | Cluster8    | 0.107 | False |
| 39.602   | 3.505      | 11.3    | 0.0     | Age       | (Intercept) | nan   | nan   |
| 192.1    | 191.297    | 1.004   | 0.319   | Age       | Cluster9    | 1.0   | False |
| 37.923   | 2.921      | 12.982  | 0.0     | Age       | (Intercept) | nan   | nan   |
| 67.573   | 29.699     | 2.275   | 0.026   | Age       | Cluster10   | 0.314 | False |
| 29.794   | 4.827      | 6.172   | 0.0     | Age       | (Intercept) | nan   | nan   |
| 104.36   | 36.089     | 2.892   | 0.005   | Age       | Cluster11   | 0.062 | False |
| 43.667   | 4.514      | 9.674   | 0.0     | Age       | (Intercept) | nan   | nan   |
| -14.887  | 41.752     | -0.357  | 0.723   | Age       | Cluster12   | 1.0   | False |
| 1.138    | 0.1        | 11.344  | 0.0     | SCr       | (Intercept) | nan   | nan   |
| -2.011   | 0.916      | -2.196  | 0.032   | SCr       | Cluster1    | 0.379 | False |
| 1.147    | 0.146      | 7.839   | 0.0     | SCr       | (Intercept) | nan   | nan   |
| -1.081   | 0.785      | -1.377  | 0.173   | SCr       | Cluster2    | 1.0   | False |
| 0.589    | 0.108      | 5.43    | 0.0     | SCr       | (Intercept) | nan   | nan   |
| 3.844    | 0.935      | 4.109   | 0.0     | SCr       | Cluster3    | 0.001 | True  |
| 1.215    | 0.12       | 10.143  | 0.0     | SCr       | (Intercept) | nan   | nan   |
| -2.843   | 1.169      | -2.432  | 0.018   | SCr       | Cluster4    | 0.213 | False |
| 1.296    | 0.154      | 8.439   | 0.0     | SCr       | (Intercept) | nan   | nan   |
| -11.873  | 5.055      | -2.349  | 0.022   | SCr       | Cluster5    | 0.262 | False |
| 1.182    | 0.102      | 11.562  | 0.0     | SCr       | (Intercept) | nan   | nan   |
| -2.099   | 0.793      | -2.647  | 0.01    | SCr       | Cluster6    | 0.122 | False |
| 1.018    | 0.095      | 10.728  | 0.0     | SCr       | (Intercept) | nan   | nan   |
| -23.93   | 31.964     | -0.749  | 0.457   | SCr       | Cluster7    | 1.0   | False |
| 1.829    | 0.242      | 7.56    | 0.0     | SCr       | (Intercept) | nan   | nan   |
| -6.323   | 1.719      | -3.678  | 0.0     | SCr       | Cluster8    | 0.006 | True  |
| 0.945    | 0.1        | 9.487   | 0.0     | SCr       | (Intercept) | nan   | nan   |

| Estimate | Std. Error | t value | p-value | Variables | Cluster     | Bonf  | Sig   |
|----------|------------|---------|---------|-----------|-------------|-------|-------|
| 1.483    | 5.439      | 0.273   | 0.786   | SCr       | Cluster9    | 1.0   | False |
| 0.7      | 0.07       | 10.061  | 0.0     | SCr       | (Intercept) | nan   | nan   |
| 4.125    | 0.707      | 5.832   | 0.0     | SCr       | Cluster10   | 0.0   | True  |
| 0.466    | 0.127      | 3.664   | 0.0     | SCr       | (Intercept) | nan   | nan   |
| 4.176    | 0.951      | 4.389   | 0.0     | SCr       | Cluster11   | 0.001 | True  |
| 1.156    | 0.125      | 9.276   | 0.0     | SCr       | (Intercept) | nan   | nan   |
| -2.041   | 1.153      | -1.771  | 0.081   | SCr       | Cluster12   | 0.974 | False |
| 1.842    | 0.37       | 4.983   | 0.0     | UPro      | (Intercept) | nan   | nan   |
| -5.475   | 3.373      | -1.623  | 0.109   | UPro      | Cluster1    | 1.0   | False |
| 1.684    | 0.537      | 3.138   | 0.003   | UPro      | (Intercept) | nan   | nan   |
| -1.858   | 2.88       | -0.645  | 0.521   | UPro      | Cluster2    | 1.0   | False |
| 0.161    | 0.404      | 0.399   | 0.691   | UPro      | (Intercept) | nan   | nan   |
| 12.343   | 3.485      | 3.542   | 0.001   | UPro      | Cluster3    | 0.009 | True  |
| 2.335    | 0.432      | 5.406   | 0.0     | UPro      | (Intercept) | nan   | nan   |
| -10.971  | 4.213      | -2.604  | 0.011   | UPro      | Cluster4    | 0.136 | False |
| 2.491    | 0.56       | 4.45    | 0.0     | UPro      | (Intercept) | nan   | nan   |
| -40.262  | 18.43      | -2.185  | 0.032   | UPro      | Cluster5    | 0.39  | False |
| 2.052    | 0.376      | 5.464   | 0.0     | UPro      | (Intercept) | nan   | nan   |
| -6.603   | 2.913      | -2.267  | 0.027   | UPro      | Cluster6    | 0.32  | False |
| 1.75     | 0.34       | 5.15    | 0.0     | UPro      | (Intercept) | nan   | nan   |
| -173.126 | 114.447    | -1.513  | 0.135   | UPro      | Cluster7    | 1.0   | False |
| 3.442    | 0.926      | 3.716   | 0.0     | UPro      | (Intercept) | nan   | nan   |
| -15.171  | 6.584      | -2.304  | 0.024   | UPro      | Cluster8    | 0.292 | False |
| 1.567    | 0.36       | 4.35    | 0.0     | UPro      | (Intercept) | nan   | nan   |
| -13.946  | 19.66      | -0.709  | 0.481   | UPro      | Cluster9    | 1.0   | False |
| 0.582    | 0.273      | 2.132   | 0.037   | UPro      | (Intercept) | nan   | nan   |
| 12.267   | 2.773      | 4.423   | 0.0     | UPro      | Cluster10   | 0.0   | True  |
| -0.271   | 0.473      | -0.573  | 0.569   | UPro      | (Intercept) | nan   | nan   |
| 13.738   | 3.539      | 3.882   | 0.0     | UPro      | Cluster11   | 0.003 | True  |
| 2.271    | 0.444      | 5.11    | 0.0     | UPro      | (Intercept) | nan   | nan   |
| -9.644   | 4.111      | -2.346  | 0.022   | UPro      | Cluster12   | 0.264 | False |
| 127.987  | 3.329      | 38.444  | 0.0     | SBP       | (Intercept) | nan   | nan   |
| -44.925  | 30.374     | -1.479  | 0.144   | SBP       | Cluster1    | 1.0   | False |
| 131.188  | 4.735      | 27.708  | 0.0     | SBP       | (Intercept) | nan   | nan   |
| -42.068  | 25.408     | -1.656  | 0.103   | SBP       | Cluster2    | 1.0   | False |
| 111.445  | 3.499      | 31.853  | 0.0     | SBP       | (Intercept) | nan   | nan   |
| 129.289  | 30.181     | 4.284   | 0.0     | SBP       | Cluster3    | 0.001 | True  |
| 134.002  | 3.816      | 35.117  | 0.0     | SBP       | (Intercept) | nan   | nan   |
| -112.482 | 37.219     | -3.022  | 0.004   | SBP       | Cluster4    | 0.043 | True  |
| 129.972  | 5.143      | 25.273  | 0.0     | SBP       | (Intercept) | nan   | nan   |
| -210.265 | 169.332    | -1.242  | 0.219   | SBP       | Cluster5    | 1.0   | False |
| 127.333  | 3.465      | 36.747  | 0.0     | SBP       | (Intercept) | nan   | nan   |
| -31.079  | 26.876     | -1.156  | 0.252   | SBP       | Cluster6    | 1.0   | False |
| 123.508  | 3.1        | 39.836  | 0.0     | SBP       | (Intercept) | nan   | nan   |
| 286.412  | 1044.305   | 0.274   | 0.785   | SBP       | Cluster7    | 1.0   | False |
| 144.633  | 8.241      | 17.55   | 0.0     | SBP       | (Intercept) | nan   | nan   |
| -150.247 | 58.579     | -2.565  | 0.013   | SBP       | Cluster8    | 0.151 | False |

| Estimate | Std. Error | t value | p-value | Variables     | Cluster     | Bonf  | Sig   |
|----------|------------|---------|---------|---------------|-------------|-------|-------|
| 122.513  | 3.235      | 37.876  | 0.0     | SBP           | (Intercept) | nan   | nan   |
| 116.14   | 176.557    | 0.658   | 0.513   | SBP           | Cluster9    | 1.0   | False |
| 118.223  | 2.557      | 46.228  | 0.0     | SBP           | (Intercept) | nan   | nan   |
| 91.673   | 25.999     | 3.526   | 0.001   | SBP           | Cluster10   | 0.009 | True  |
| 113.229  | 4.463      | 25.369  | 0.0     | SBP           | (Intercept) | nan   | nan   |
| 91.134   | 33.368     | 2.731   | 0.008   | SBP           | Cluster11   | 0.097 | False |
| 128.599  | 4.103      | 31.344  | 0.0     | SBP           | (Intercept) | nan   | nan   |
| -47.939  | 37.95      | -1.263  | 0.211   | SBP           | Cluster12   | 1.0   | False |
| -0.106   | 0.052      | -2.029  | 0.123   | UOB_+/-<br>-- | Cluster1    | nan   | False |
| -0.034   | 0.046      | -0.733  | 0.82    | UOB_+ -<br>-  | Cluster1    | nan   | False |
| -0.056   | 0.037      | -1.532  | 0.306   | UOB_2+<br>--  | Cluster1    | nan   | False |
| -0.058   | 0.037      | -1.595  | 0.276   | UOB_3+<br>--  | Cluster1    | nan   | False |
| 0.03     | 0.062      | 0.491   | 0.943   | UOB_+/-<br>-- | Cluster2    | nan   | False |
| 0.094    | 0.054      | 1.728   | 0.219   | UOB_+ -<br>-  | Cluster2    | nan   | False |
| 0.017    | 0.043      | 0.399   | 0.971   | UOB_2+<br>--  | Cluster2    | nan   | False |
| 0.008    | 0.043      | 0.19    | 0.998   | UOB_3+<br>--  | Cluster2    | nan   | False |
| 0.041    | 0.047      | 0.868   | 0.731   | UOB_+/-<br>-- | Cluster3    | nan   | False |
| 0.011    | 0.042      | 0.259   | 0.994   | UOB_+ -<br>-  | Cluster3    | nan   | False |
| 0.055    | 0.033      | 1.674   | 0.241   | UOB_2+<br>--  | Cluster3    | nan   | False |
| 0.041    | 0.033      | 1.229   | 0.481   | UOB_3+<br>--  | Cluster3    | nan   | False |
| 0.046    | 0.041      | 1.129   | 0.547   | UOB_+/-<br>-- | Cluster4    | nan   | False |
| -0.019   | 0.036      | -0.532  | 0.926   | UOB_+ -<br>-  | Cluster4    | nan   | False |
| 0.001    | 0.029      | 0.022   | 1.0     | UOB_2+<br>--  | Cluster4    | nan   | False |
| 0.012    | 0.029      | 0.433   | 0.962   | UOB_3+<br>--  | Cluster4    | nan   | False |
| 0.001    | 0.01       | 0.083   | 1.0     | UOB_+/-<br>-- | Cluster5    | nan   | False |
| -0.002   | 0.008      | -0.236  | 0.996   | UOB_+ -<br>-  | Cluster5    | nan   | False |
| 0.004    | 0.007      | 0.641   | 0.873   | UOB_2+<br>--  | Cluster5    | nan   | False |
| 0.003    | 0.007      | 0.494   | 0.942   | UOB_3+<br>--  | Cluster5    | nan   | False |

| Estimate | Std. Error | t value | p-value | Variables     | Cluster   | Bonf | Sig   |
|----------|------------|---------|---------|---------------|-----------|------|-------|
| -0.22    | 0.051      | -4.331  | 0.0     | UOB_+/-<br>-- | Cluster6  | nan  | True  |
| -0.153   | 0.045      | -3.422  | 0.003   | UOB_+ -<br>-  | Cluster6  | nan  | True  |
| -0.178   | 0.036      | -4.988  | 0.0     | UOB_2+<br>--  | Cluster6  | nan  | True  |
| -0.181   | 0.036      | -5.078  | 0.0     | UOB_3+<br>--  | Cluster6  | nan  | True  |
| 0.001    | 0.002      | 0.586   | 0.902   | UOB_+/-<br>-- | Cluster7  | nan  | False |
| 0.001    | 0.001      | 0.535   | 0.925   | UOB_+ -<br>-  | Cluster7  | nan  | False |
| 0.001    | 0.001      | 1.104   | 0.565   | UOB_2+<br>--  | Cluster7  | nan  | False |
| 0.001    | 0.001      | 0.97    | 0.659   | UOB_3+<br>--  | Cluster7  | nan  | False |
| 0.024    | 0.027      | 0.91    | 0.701   | UOB_+/-<br>-- | Cluster8  | nan  | False |
| 0.011    | 0.023      | 0.478   | 0.947   | UOB_+ -<br>-  | Cluster8  | nan  | False |
| -0.003   | 0.019      | -0.146  | 0.999   | UOB_2+<br>--  | Cluster8  | nan  | False |
| 0.008    | 0.019      | 0.417   | 0.966   | UOB_3+<br>--  | Cluster8  | nan  | False |
| 0.004    | 0.009      | 0.412   | 0.968   | UOB_+/-<br>-- | Cluster9  | nan  | False |
| 0.006    | 0.008      | 0.763   | 0.8     | UOB_+ -<br>-  | Cluster9  | nan  | False |
| 0.01     | 0.006      | 1.515   | 0.315   | UOB_2+<br>--  | Cluster9  | nan  | False |
| 0.007    | 0.006      | 1.147   | 0.536   | UOB_3+<br>--  | Cluster9  | nan  | False |
| 0.014    | 0.058      | 0.242   | 0.995   | UOB_+/-<br>-- | Cluster10 | nan  | False |
| 0.014    | 0.051      | 0.285   | 0.991   | UOB_+ -<br>-  | Cluster10 | nan  | False |
| 0.049    | 0.04       | 1.227   | 0.482   | UOB_2+<br>--  | Cluster10 | nan  | False |
| 0.051    | 0.04       | 1.254   | 0.465   | UOB_3+<br>--  | Cluster10 | nan  | False |
| 0.094    | 0.046      | 2.061   | 0.115   | UOB_+/-<br>-- | Cluster11 | nan  | False |
| 0.047    | 0.04       | 1.18    | 0.513   | UOB_+ -<br>-  | Cluster11 | nan  | False |
| 0.056    | 0.032      | 1.757   | 0.208   | UOB_2+<br>--  | Cluster11 | nan  | False |
| 0.06     | 0.032      | 1.87    | 0.168   | UOB_3+<br>--  | Cluster11 | nan  | False |



| <b>Estimate</b> | <b>Std. Error</b> | <b>t value</b> | <b>p-value</b> | <b>Variables</b> | <b>Cluster</b> | <b>Bonf</b> | <b>Sig</b> |
|-----------------|-------------------|----------------|----------------|------------------|----------------|-------------|------------|
| 0.071           | 0.042             | 1.673          | 0.241          | UOB_+/-<br>--    | Cluster12      | nan         | False      |
| 0.023           | 0.037             | 0.617          | 0.886          | UOB_+ -<br>-     | Cluster12      | nan         | False      |
| 0.042           | 0.03              | 1.419          | 0.366          | UOB_2+<br>--     | Cluster12      | nan         | False      |
| 0.048           | 0.03              | 1.617          | 0.266          | UOB_3+<br>--     | Cluster12      | nan         | False      |

Estimate, the estimated coefficients of the linear model or ANOVA; Std. Error, the standard error for the estimate; t value, t-statistic; p-value, p-value (for UOB, adjusted by Dunnett's method); Variables, clinical variables assessed with the score of the cluster (for UOB, the pair of comparison); Cluster, the cluster assessed with the clinical variables; Bonf, the p-value corrected by Bonferroni procedure for continuous variables; Sig, statistical significance.

**Supplementary Table S3. The R squared values for the linear models investigating the relationship between the scores and clinical variables**

| <b>R2</b> | <b>Variable</b> | <b>Cluster</b> |
|-----------|-----------------|----------------|
| 0.016     | Age             | Cluster1       |
| 0.003     | Age             | Cluster2       |
| 0.126     | Age             | Cluster3       |
| 0.026     | Age             | Cluster4       |
| 0.026     | Age             | Cluster5       |
| 0.116     | Age             | Cluster6       |
| 0.003     | Age             | Cluster7       |
| 0.099     | Age             | Cluster8       |
| 0.015     | Age             | Cluster9       |
| 0.073     | Age             | Cluster10      |
| 0.112     | Age             | Cluster11      |
| 0.002     | Age             | Cluster12      |
| 0.068     | SCr             | Cluster1       |
| 0.028     | SCr             | Cluster2       |
| 0.204     | SCr             | Cluster3       |
| 0.082     | SCr             | Cluster4       |
| 0.077     | SCr             | Cluster5       |
| 0.096     | SCr             | Cluster6       |
| 0.008     | SCr             | Cluster7       |
| 0.17      | SCr             | Cluster8       |
| 0.001     | SCr             | Cluster9       |
| 0.34      | SCr             | Cluster10      |
| 0.226     | SCr             | Cluster11      |
| 0.045     | SCr             | Cluster12      |
| 0.038     | UPro            | Cluster1       |
| 0.006     | UPro            | Cluster2       |
| 0.16      | UPro            | Cluster3       |
| 0.093     | UPro            | Cluster4       |
| 0.067     | UPro            | Cluster5       |
| 0.072     | UPro            | Cluster6       |
| 0.034     | UPro            | Cluster7       |
| 0.074     | UPro            | Cluster8       |
| 0.008     | UPro            | Cluster9       |
| 0.229     | UPro            | Cluster10      |
| 0.186     | UPro            | Cluster11      |
| 0.077     | UPro            | Cluster12      |
| 0.032     | SBP             | Cluster1       |
| 0.04      | SBP             | Cluster2       |
| 0.218     | SBP             | Cluster3       |
| 0.122     | SBP             | Cluster4       |
| 0.023     | SBP             | Cluster5       |
| 0.02      | SBP             | Cluster6       |

| <b>R2</b> | <b>Variable</b> | <b>Cluster</b> |
|-----------|-----------------|----------------|
| 0.001     | SBP             | Cluster7       |
| 0.091     | SBP             | Cluster8       |
| 0.007     | SBP             | Cluster9       |
| 0.159     | SBP             | Cluster10      |
| 0.102     | SBP             | Cluster11      |
| 0.024     | SBP             | Cluster12      |
| 0.071     | UOB             | Cluster1       |
| 0.074     | UOB             | Cluster2       |
| 0.066     | UOB             | Cluster3       |
| 0.053     | UOB             | Cluster4       |
| 0.022     | UOB             | Cluster5       |
| 0.316     | UOB             | Cluster6       |
| 0.021     | UOB             | Cluster7       |
| 0.04      | UOB             | Cluster8       |
| 0.043     | UOB             | Cluster9       |
| 0.045     | UOB             | Cluster10      |
| 0.073     | UOB             | Cluster11      |
| 0.06      | UOB             | Cluster12      |

R2, R-squared values for the linear models; Variable, clinical variables; Cluster, the cluster assessed with the clinical variables

**Supplementary Table S4. The statistical summary of the linear models testing the relationship between the patch-based scores and the clinical variables**

| Estimate | Std. Error | t value | p-value | Variables | Cluster     | Bonf  | Sig   |
|----------|------------|---------|---------|-----------|-------------|-------|-------|
| 34.753   | 4.041      | 8.601   | 0.0     | Age       | (Intercept) | nan   | nan   |
| 2.267    | 1.019      | 2.225   | 0.03    | Age       | Cluster1    | 0.295 | False |
| 45.283   | 3.553      | 12.745  | 0.0     | Age       | (Intercept) | nan   | nan   |
| -16.969  | 15.437     | -1.099  | 0.276   | Age       | Cluster2    | 1.0   | False |
| 35.498   | 3.403      | 10.431  | 0.0     | Age       | (Intercept) | nan   | nan   |
| 4.96     | 1.91       | 2.597   | 0.012   | Age       | Cluster3    | 0.116 | False |
| 42.355   | 2.605      | 16.26   | 0.0     | Age       | (Intercept) | nan   | nan   |
| -0.105   | 1.724      | -0.061  | 0.952   | Age       | Cluster4    | 1.0   | False |
| 49.037   | 5.434      | 9.025   | 0.0     | Age       | (Intercept) | nan   | nan   |
| -3.24    | 2.369      | -1.368  | 0.176   | Age       | Cluster5    | 1.0   | False |
| 50.495   | 5.467      | 9.236   | 0.0     | Age       | (Intercept) | nan   | nan   |
| -2.775   | 1.684      | -1.648  | 0.104   | Age       | Cluster6    | 1.0   | False |
| 49.421   | 4.453      | 11.099  | 0.0     | Age       | (Intercept) | nan   | nan   |
| -3.301   | 1.781      | -1.854  | 0.068   | Age       | Cluster7    | 0.682 | False |
| 41.313   | 2.916      | 14.167  | 0.0     | Age       | (Intercept) | nan   | nan   |
| 2.226    | 4.17       | 0.534   | 0.595   | Age       | Cluster8    | 1.0   | False |
| 42.37    | 2.547      | 16.634  | 0.0     | Age       | (Intercept) | nan   | nan   |
| -0.212   | 2.609      | -0.081  | 0.936   | Age       | Cluster9    | 1.0   | False |
| 46.578   | 4.249      | 10.963  | 0.0     | Age       | (Intercept) | nan   | nan   |
| -1.831   | 1.531      | -1.196  | 0.236   | Age       | Cluster10   | 1.0   | False |
| 0.669    | 0.11       | 6.083   | 0.0     | SCr       | (Intercept) | nan   | nan   |
| 0.09     | 0.028      | 3.232   | 0.002   | SCr       | Cluster1    | 0.019 | True  |
| 1.057    | 0.1        | 10.555  | 0.0     | SCr       | (Intercept) | nan   | nan   |
| -0.516   | 0.435      | -1.185  | 0.24    | SCr       | Cluster2    | 1.0   | False |
| 0.626    | 0.085      | 7.376   | 0.0     | SCr       | (Intercept) | nan   | nan   |
| 0.249    | 0.048      | 5.23    | 0.0     | SCr       | Cluster3    | 0.0   | True  |
| 0.965    | 0.074      | 13.12   | 0.0     | SCr       | (Intercept) | nan   | nan   |
| 0.001    | 0.049      | 0.029   | 0.977   | SCr       | Cluster4    | 1.0   | False |
| 1.166    | 0.153      | 7.615   | 0.0     | SCr       | (Intercept) | nan   | nan   |
| -0.096   | 0.067      | -1.439  | 0.155   | SCr       | Cluster5    | 1.0   | False |
| 1.356    | 0.148      | 9.139   | 0.0     | SCr       | (Intercept) | nan   | nan   |
| -0.132   | 0.046      | -2.885  | 0.005   | SCr       | Cluster6    | 0.053 | False |
| 1.279    | 0.121      | 10.574  | 0.0     | SCr       | (Intercept) | nan   | nan   |
| -0.145   | 0.048      | -2.994  | 0.004   | SCr       | Cluster7    | 0.039 | True  |
| 0.862    | 0.08       | 10.788  | 0.0     | SCr       | (Intercept) | nan   | nan   |
| 0.24     | 0.114      | 2.101   | 0.039   | SCr       | Cluster8    | 0.395 | False |
| 0.978    | 0.072      | 13.608  | 0.0     | SCr       | (Intercept) | nan   | nan   |
| -0.027   | 0.074      | -0.372  | 0.711   | SCr       | Cluster9    | 1.0   | False |
| 1.221    | 0.115      | 10.584  | 0.0     | SCr       | (Intercept) | nan   | nan   |
| -0.109   | 0.042      | -2.618  | 0.011   | SCr       | Cluster10   | 0.11  | False |
| 0.662    | 0.416      | 1.592   | 0.116   | UPro      | (Intercept) | nan   | nan   |

| Estimate | Std. Error | t value | p-value | Variables     | Cluster     | Bonf  | Sig   |
|----------|------------|---------|---------|---------------|-------------|-------|-------|
| 0.214    | 0.105      | 2.038   | 0.046   | UPro          | Cluster1    | 0.455 | False |
| 1.405    | 0.367      | 3.829   | 0.0     | UPro          | (Intercept) | nan   | nan   |
| -0.187   | 1.595      | -0.117  | 0.907   | UPro          | Cluster2    | 1.0   | False |
| 0.396    | 0.331      | 1.198   | 0.235   | UPro          | (Intercept) | nan   | nan   |
| 0.714    | 0.186      | 3.849   | 0.0     | UPro          | Cluster3    | 0.003 | True  |
| 1.465    | 0.266      | 5.513   | 0.0     | UPro          | (Intercept) | nan   | nan   |
| -0.128   | 0.176      | -0.729  | 0.468   | UPro          | Cluster4    | 1.0   | False |
| 2.12     | 0.555      | 3.82    | 0.0     | UPro          | (Intercept) | nan   | nan   |
| -0.359   | 0.242      | -1.481  | 0.143   | UPro          | Cluster5    | 1.0   | False |
| 2.318    | 0.557      | 4.165   | 0.0     | UPro          | (Intercept) | nan   | nan   |
| -0.32    | 0.171      | -1.864  | 0.067   | UPro          | Cluster6    | 0.668 | False |
| 2.12     | 0.455      | 4.657   | 0.0     | UPro          | (Intercept) | nan   | nan   |
| -0.346   | 0.182      | -1.899  | 0.062   | UPro          | Cluster7    | 0.62  | False |
| 1.294    | 0.299      | 4.33    | 0.0     | UPro          | (Intercept) | nan   | nan   |
| 0.181    | 0.427      | 0.423   | 0.674   | UPro          | Cluster8    | 1.0   | False |
| 1.383    | 0.261      | 5.303   | 0.0     | UPro          | (Intercept) | nan   | nan   |
| -0.025   | 0.267      | -0.093  | 0.926   | UPro          | Cluster9    | 1.0   | False |
| 1.698    | 0.437      | 3.885   | 0.0     | UPro          | (Intercept) | nan   | nan   |
| -0.139   | 0.157      | -0.881  | 0.381   | UPro          | Cluster10   | 1.0   | False |
| 116.649  | 3.689      | 31.617  | 0.0     | SBP           | (Intercept) | nan   | nan   |
| 2.254    | 0.93       | 2.423   | 0.018   | SBP           | Cluster1    | 0.182 | False |
| 123.946  | 3.295      | 37.619  | 0.0     | SBP           | (Intercept) | nan   | nan   |
| 1.054    | 14.315     | 0.074   | 0.942   | SBP           | Cluster2    | 1.0   | False |
| 116.32   | 3.035      | 38.331  | 0.0     | SBP           | (Intercept) | nan   | nan   |
| 5.714    | 1.703      | 3.356   | 0.001   | SBP           | Cluster3    | 0.013 | True  |
| 125.487  | 2.368      | 52.99   | 0.0     | SBP           | (Intercept) | nan   | nan   |
| -1.884   | 1.567      | -1.202  | 0.234   | SBP           | Cluster4    | 1.0   | False |
| 125.967  | 5.058      | 24.907  | 0.0     | SBP           | (Intercept) | nan   | nan   |
| -0.88    | 2.205      | -0.399  | 0.691   | SBP           | Cluster5    | 1.0   | False |
| 132.872  | 4.989      | 26.634  | 0.0     | SBP           | (Intercept) | nan   | nan   |
| -2.952   | 1.537      | -1.921  | 0.059   | SBP           | Cluster6    | 0.59  | False |
| 131.875  | 4.05       | 32.563  | 0.0     | SBP           | (Intercept) | nan   | nan   |
| -3.579   | 1.619      | -2.21   | 0.031   | SBP           | Cluster7    | 0.306 | False |
| 122.413  | 2.664      | 45.952  | 0.0     | SBP           | (Intercept) | nan   | nan   |
| 3.96     | 3.809      | 1.04    | 0.302   | SBP           | Cluster8    | 1.0   | False |
| 125.174  | 2.322      | 53.896  | 0.0     | SBP           | (Intercept) | nan   | nan   |
| -2.441   | 2.379      | -1.026  | 0.309   | SBP           | Cluster9    | 1.0   | False |
| 126.684  | 3.929      | 32.242  | 0.0     | SBP           | (Intercept) | nan   | nan   |
| -1.087   | 1.415      | -0.768  | 0.445   | SBP           | Cluster10   | 1.0   | False |
| 0.514    | 1.666      | 0.308   | 0.988   | UOB_+/-<br>-- | Cluster1    | nan   | False |
| 1.999    | 1.464      | 1.366   | 0.396   | UOB_+ -<br>-  | Cluster1    | nan   | False |
| 1.938    | 1.166      | 1.662   | 0.246   | UOB_2+<br>--  | Cluster1    | nan   | False |
| 2.009    | 1.166      | 1.723   | 0.221   | UOB_3+<br>--  | Cluster1    | nan   | False |

| <b>Estimate</b> | <b>Std. Error</b> | <b>t value</b> | <b>p-value</b> | <b>Variables</b> | <b>Cluster</b> | <b>Bonf</b> | <b>Sig</b> |
|-----------------|-------------------|----------------|----------------|------------------|----------------|-------------|------------|
| -0.18           | 0.114             | -1.587         | 0.279          | UOB_+/-<br>--    | Cluster2       | nan         | False      |
| -0.086          | 0.1               | -0.866         | 0.731          | UOB_+ -<br>-     | Cluster2       | nan         | False      |
| -0.081          | 0.08              | -1.013         | 0.628          | UOB_2+<br>--     | Cluster2       | nan         | False      |
| -0.116          | 0.08              | -1.458         | 0.344          | UOB_3+<br>--     | Cluster2       | nan         | False      |
| 0.51            | 0.88              | 0.58           | 0.905          | UOB_+/-<br>--    | Cluster3       | nan         | False      |
| 0.242           | 0.773             | 0.313          | 0.987          | UOB_+ -<br>-     | Cluster3       | nan         | False      |
| 0.981           | 0.616             | 1.593          | 0.277          | UOB_2+<br>--     | Cluster3       | nan         | False      |
| 0.802           | 0.616             | 1.302          | 0.434          | UOB_3+<br>--     | Cluster3       | nan         | False      |
| 0.498           | 1.022             | 0.488          | 0.944          | UOB_+/-<br>--    | Cluster4       | nan         | False      |
| 0.23            | 0.897             | 0.257          | 0.994          | UOB_+ -<br>-     | Cluster4       | nan         | False      |
| 0.231           | 0.715             | 0.324          | 0.986          | UOB_2+<br>--     | Cluster4       | nan         | False      |
| 0.878           | 0.715             | 1.228          | 0.482          | UOB_3+<br>--     | Cluster4       | nan         | False      |
| -0.088          | 0.712             | -0.124         | 1.0            | UOB_+/-<br>--    | Cluster5       | nan         | False      |
| 0.462           | 0.626             | 0.739          | 0.816          | UOB_+ -<br>-     | Cluster5       | nan         | False      |
| -0.616          | 0.498             | -1.236         | 0.476          | UOB_2+<br>--     | Cluster5       | nan         | False      |
| -0.641          | 0.498             | -1.286         | 0.445          | UOB_3+<br>--     | Cluster5       | nan         | False      |
| 1.141           | 1.033             | 1.105          | 0.564          | UOB_+/-<br>--    | Cluster6       | nan         | False      |
| -0.444          | 0.907             | -0.49          | 0.943          | UOB_+ -<br>-     | Cluster6       | nan         | False      |
| 0.117           | 0.723             | 0.161          | 0.999          | UOB_2+<br>--     | Cluster6       | nan         | False      |
| -0.135          | 0.723             | -0.187         | 0.998          | UOB_3+<br>--     | Cluster6       | nan         | False      |
| 1.141           | 0.953             | 1.198          | 0.501          | UOB_+/-<br>--    | Cluster7       | nan         | False      |
| -0.709          | 0.837             | -0.848         | 0.744          | UOB_+ -<br>-     | Cluster7       | nan         | False      |
| -0.258          | 0.667             | -0.387         | 0.974          | UOB_2+<br>--     | Cluster7       | nan         | False      |
| -0.541          | 0.667             | -0.811         | 0.769          | UOB_3+<br>--     | Cluster7       | nan         | False      |

| Estimate | Std. Error | t value | p-value | Variables     | Cluster   | Bonf | Sig   |
|----------|------------|---------|---------|---------------|-----------|------|-------|
| -0.119   | 0.424      | -0.282  | 0.991   | UOB_+/-<br>-- | Cluster8  | nan  | False |
| 0.443    | 0.372      | 1.191   | 0.506   | UOB_+ -<br>-  | Cluster8  | nan  | False |
| 0.348    | 0.296      | 1.173   | 0.518   | UOB_2+<br>--  | Cluster8  | nan  | False |
| 0.254    | 0.296      | 0.856   | 0.739   | UOB_3+<br>--  | Cluster8  | nan  | False |
| -0.296   | 0.676      | -0.438  | 0.96    | UOB_+/-<br>-- | Cluster9  | nan  | False |
| -0.458   | 0.594      | -0.771  | 0.795   | UOB_+ -<br>-  | Cluster9  | nan  | False |
| -0.31    | 0.473      | -0.655  | 0.866   | UOB_2+<br>--  | Cluster9  | nan  | False |
| 0.1      | 0.473      | 0.212   | 0.997   | UOB_3+<br>--  | Cluster9  | nan  | False |
| -3.119   | 1.06       | -2.943  | 0.014   | UOB_+/-<br>-- | Cluster10 | nan  | True  |
| -1.679   | 0.931      | -1.803  | 0.191   | UOB_+ -<br>-  | Cluster10 | nan  | False |
| -2.35    | 0.742      | -3.168  | 0.007   | UOB_2+<br>--  | Cluster10 | nan  | True  |
| -2.609   | 0.742      | -3.518  | 0.003   | UOB_3+<br>--  | Cluster10 | nan  | True  |

Estimate, the estimated coefficients of the linear model or ANOVA; Std. Error, the standard error for the estimate; t value, t-statistic; p-value, p-value (for UOB, adjusted by Dunnett's method); Variables, clinical variables assessed with the score of the cluster (for UOB, the pair of comparison); Cluster, the cluster assessed with the clinical variables; Bonf, the p-value corrected by Bonferroni procedure for continuous variables; Sig, statistical significance.

**Supplementary Table S5. The R squared values for the linear models investigating the relationship between the patch-based scores and clinical variables**

| <b>R2</b> | <b>Variable</b> | <b>Cluster</b> |
|-----------|-----------------|----------------|
| 0.07      | Age             | Cluster1       |
| 0.018     | Age             | Cluster2       |
| 0.093     | Age             | Cluster3       |
| 0.0       | Age             | Cluster4       |
| 0.028     | Age             | Cluster5       |
| 0.04      | Age             | Cluster6       |
| 0.05      | Age             | Cluster7       |
| 0.004     | Age             | Cluster8       |
| 0.0       | Age             | Cluster9       |
| 0.021     | Age             | Cluster10      |
| 0.137     | SCr             | Cluster1       |
| 0.021     | SCr             | Cluster2       |
| 0.293     | SCr             | Cluster3       |
| 0.0       | SCr             | Cluster4       |
| 0.03      | SCr             | Cluster5       |
| 0.112     | SCr             | Cluster6       |
| 0.12      | SCr             | Cluster7       |
| 0.063     | SCr             | Cluster8       |
| 0.002     | SCr             | Cluster9       |
| 0.094     | SCr             | Cluster10      |
| 0.059     | UPro            | Cluster1       |
| 0.0       | UPro            | Cluster2       |
| 0.183     | UPro            | Cluster3       |
| 0.008     | UPro            | Cluster4       |
| 0.032     | UPro            | Cluster5       |
| 0.05      | UPro            | Cluster6       |
| 0.052     | UPro            | Cluster7       |
| 0.003     | UPro            | Cluster8       |
| 0.0       | UPro            | Cluster9       |
| 0.012     | UPro            | Cluster10      |
| 0.082     | SBP             | Cluster1       |
| 0.0       | SBP             | Cluster2       |
| 0.146     | SBP             | Cluster3       |
| 0.021     | SBP             | Cluster4       |
| 0.002     | SBP             | Cluster5       |
| 0.053     | SBP             | Cluster6       |
| 0.069     | SBP             | Cluster7       |
| 0.016     | SBP             | Cluster8       |
| 0.016     | SBP             | Cluster9       |
| 0.009     | SBP             | Cluster10      |
| 0.062     | UOB             | Cluster1       |
| 0.052     | UOB             | Cluster2       |



| <b>R2</b> | <b>Variable</b> | <b>Cluster</b> |
|-----------|-----------------|----------------|
| 0.059     | UOB             | Cluster3       |
| 0.061     | UOB             | Cluster4       |
| 0.114     | UOB             | Cluster5       |
| 0.048     | UOB             | Cluster6       |
| 0.084     | UOB             | Cluster7       |
| 0.052     | UOB             | Cluster8       |
| 0.059     | UOB             | Cluster9       |
| 0.187     | UOB             | Cluster10      |

R2, R-squared values for the linear models; Variable, clinical variables; Cluster, the cluster assessed with the clinical variables

**Supplementary Table S6. The clinical and pathological findings of the second and third biopsy of the patient with multiple biopsies**

|                      | <b>Age</b> | <b>SCr</b> | <b>UPro</b> | <b>UOB</b> | <b>SBP</b> | <b>M</b> | <b>E</b> | <b>S</b> | <b>T</b> | <b>C</b> | <b>GS</b> | <b>SS</b> | <b>AD</b> | <b>CC</b> | <b>FC</b> |
|----------------------|------------|------------|-------------|------------|------------|----------|----------|----------|----------|----------|-----------|-----------|-----------|-----------|-----------|
| <b>Second_biopsy</b> | 39         | 0.63       | 0.3         | 2+         | 125        | 0        | 0        | 1        | 1        | 0        | 3         | 2         | 1         | 0         | 0         |
| <b>Third_biopsy</b>  | 43         | 0.77       | 2           | 2+         | 124        | 0        | 0        | 1        | 0        | 1        | 9         | 1         | 2         | 3         | 1         |

UOB, urinary occult blood; SBP, systolic blood pressure; SCr, serum creatinine value; UPro, urinary protein excretion; GS, global sclerosis; SS, segmental sclerosis; AD, adhesion; CC, cellular crescent; FC, fibrocellular crescent

### Supplementary Figure S1. The visualization of the UMAP Results

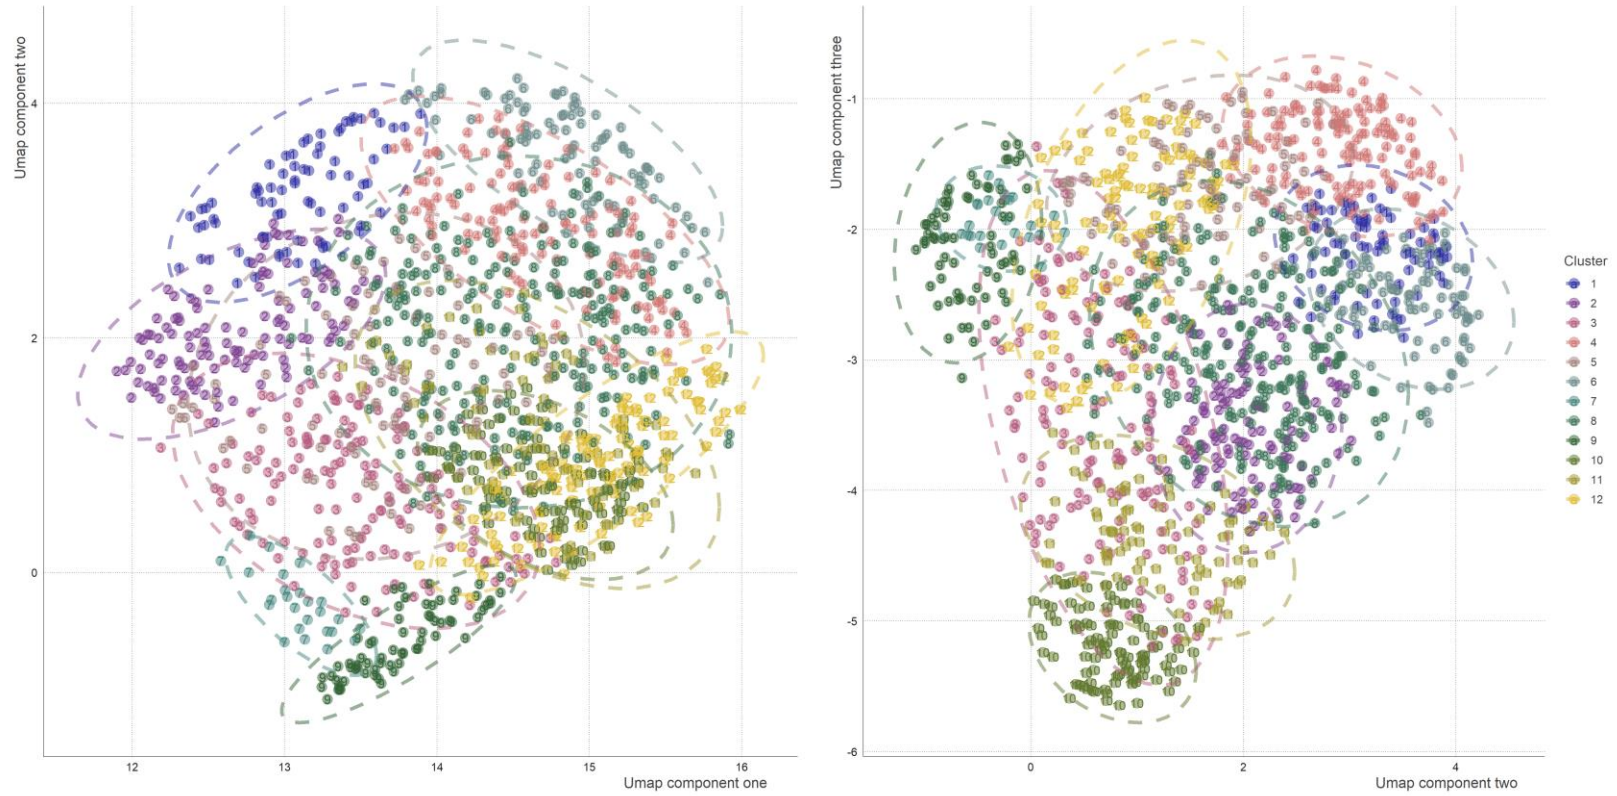

Components one, two, and three of the UMAP results are visualized. Each point represents a glomerulus, with the color representing the class of the glomerulus. UMAP, Uniform Manifold Approximation and Projection

**Supplementary Figure S2. The representative glomeruli for each cluster**

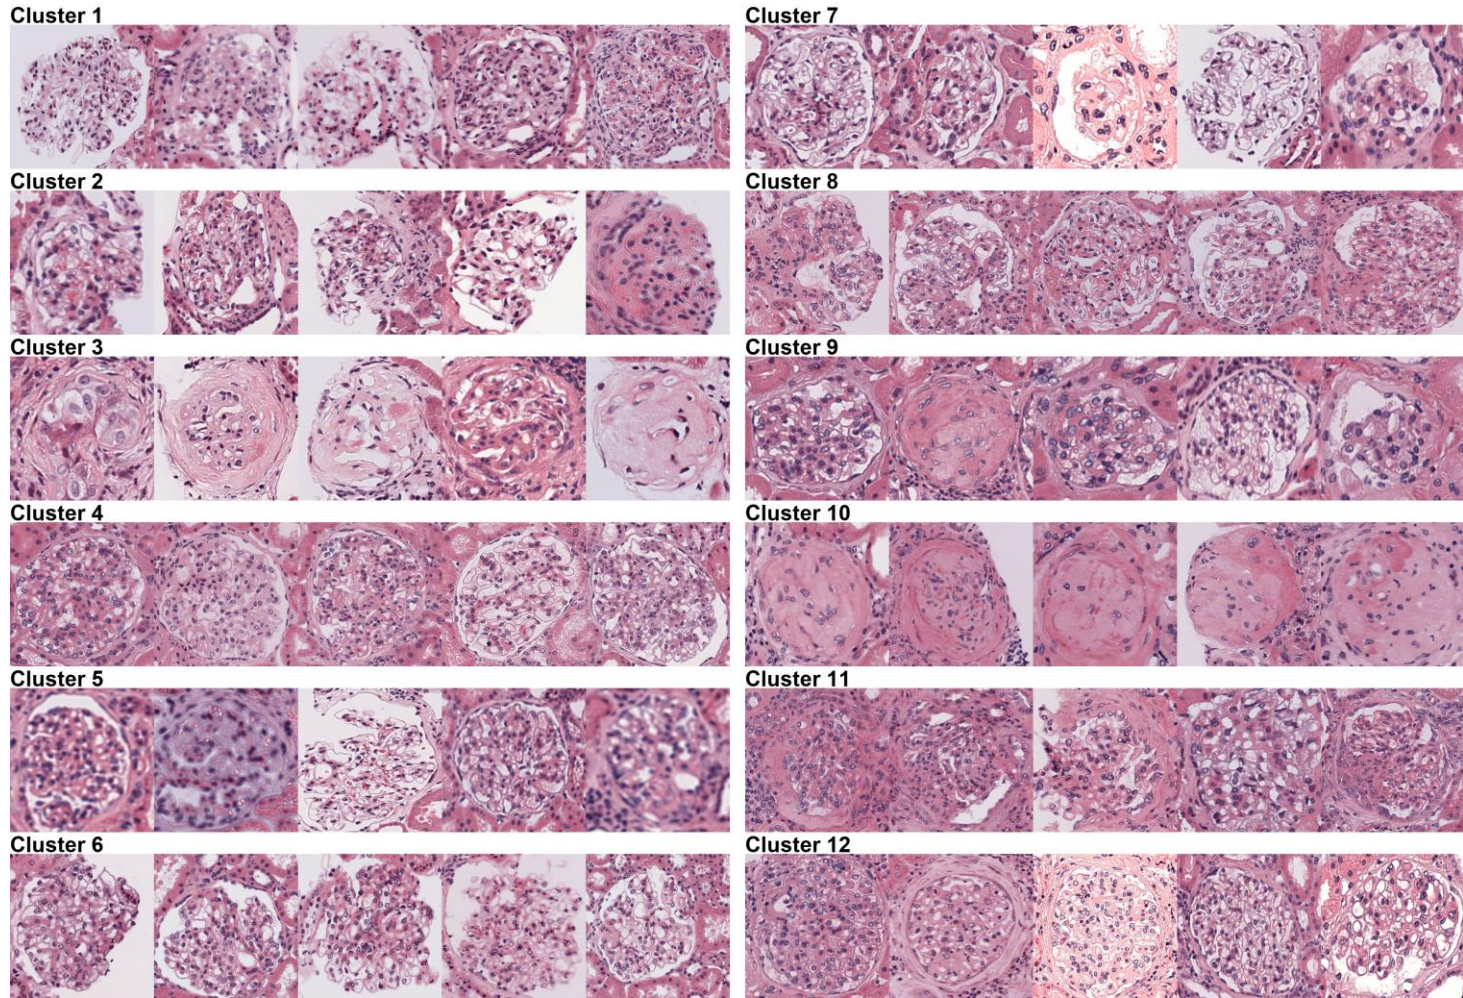

The representative glomeruli of each cluster, which had the highest five probability of the cluster were shown. From left to right in ascending order.

### Supplementary Figure S3. The changes in the patch-based scores for the patient with multiple biopsies

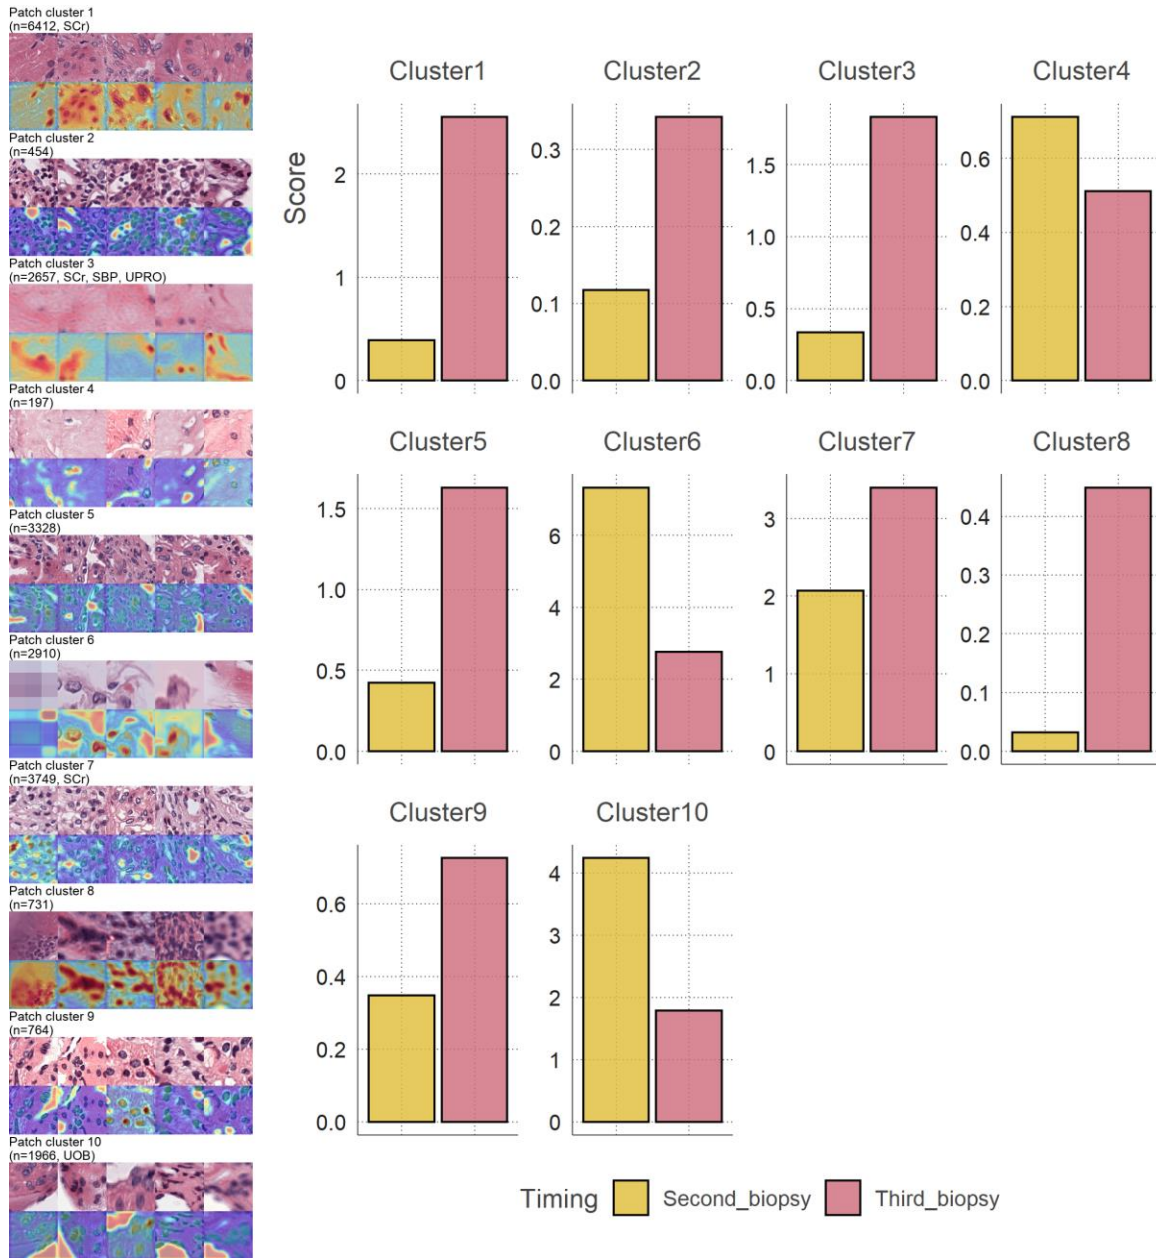

The left panel shows the clustered patches and the rationale behind the clustering visualized by Score-weighted class activation mapping. The number of patches in the class, along with the clinical variables which had a significant relationship with the score of the patch class are shown. The right panel shows the bar plot depicting the score of the second and third biopsies. UOB, urinary occult blood; SBP, systolic blood pressure; SCr, serum creatinine value; UPro, urinary protein excretion
